# Supplementary material
Source: PubMed Central journal article supplement (PMC2718375)
Supplement: 0905931106_0905931106SI.pdf [file 0905931106_0905931106SI.pdf]

# Supporting Information

Zong et al. 10.1073/pnas.0905931106

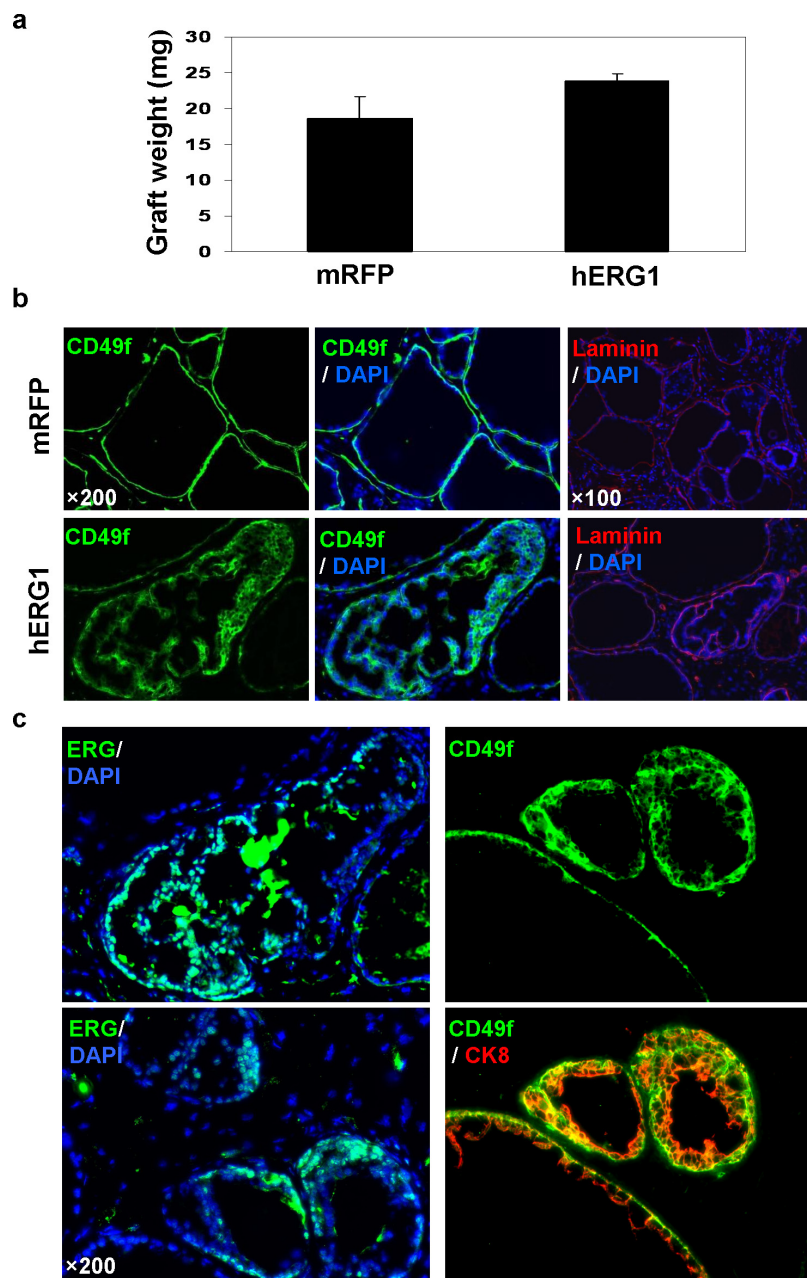

**Fig. S1.** Luminal expression of CD49f in *ERG*-transduced prostate glands. (A) No statistically significant difference ( $P > 0.05$ ) in the weight between *mRFP*- and *ERG*-transduced prostate grafts ( $n = 2$ ). (B) Increased expression of CD49f on luminal epithelial cells in *ERG*-transduced prostate tubules, as compared with *mRFP*-transduced glands. No obvious changes in the expression pattern of laminin in *ERG*-transduced prostate glands were detected. (C) IF analysis of frozen sections of *ERG*-transduced prostate grafts, showing the coexpression of CD49f and CK8 in the luminal epithelial cells of *ERG*-transduced prostate glands.

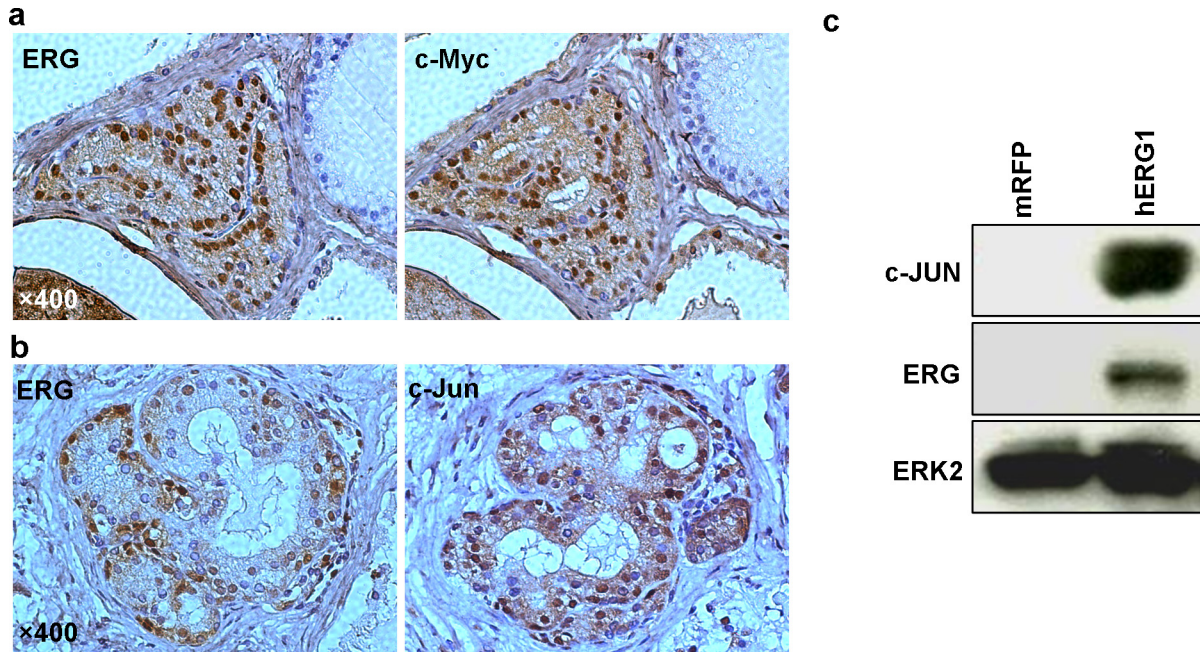

**Fig. S2.** Forced expression of ERG in murine prostate epithelial cells resulted in up-regulation of c-Myc and c-Jun protein. (A) Higher magnification views (400 $\times$ ) showing increased expression of c-Myc protein in the epithelial cells in *ERG*-transduced prostate tubules, as compared with the adjunct normal glands. (B) Up-regulation of c-Jun protein in *ERG*-overexpressing prostate glands. (C) Western blot analysis of *ERG*-transduced murine prostate PEB1 cells confirms the significant increase in c-Jun expression upon ERG overexpression. Erk2 used as a loading control.

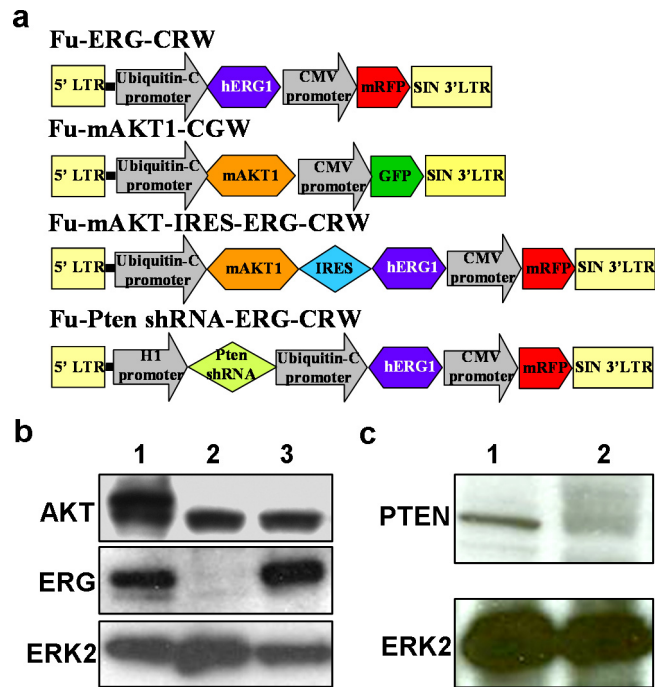

**Fig. S3.** Development and validation of lentiviral vectors. (A) The schematic maps of the self-inactivated (SIN) lentiviral vectors containing ERG, mAKT1, mAKT1-IRES-ERG, or Pten shRNA-ERG. (B) Immunoblotting analysis of AKT and ERG expression in 293T cells transduced with mAKT1-IRES-ERG vector (lane 1) or ERG lentivirus (lane 3), relative to *mRFP*-transduced cells (lane 2). (C) Western blot analysis reveals a significant decrease in Pten expression in PEB-1 cells transduced with Pten shRNA-ERG lentivirus (lane 2), in comparison with *mRFP*-transduced PEB-1 cells (lane 1). Erk2 used as a loading control.

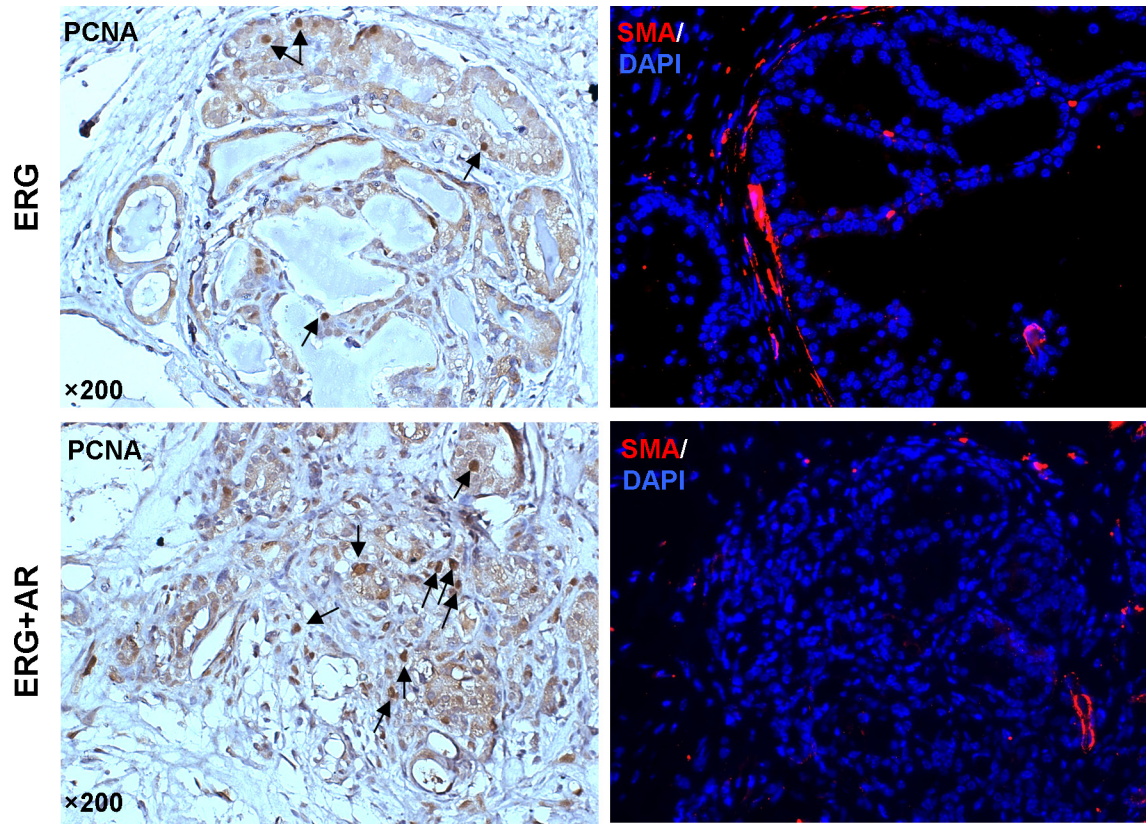

**Fig. S4.** Increased cell proliferation and local invasion in ERG/AR-induced prostate adenocarcinoma. (*Left*) IHC analysis with an anti-PCNA antibody reveals increased frequency of PCNA staining-positive cells in ERG/AR-transduced glands relative to ERG-transduced glands. (*Right*) The SMA staining is absent in ERG/AR-transduced prostate adenocarcinoma, in comparison with the presence of intact fibromuscular layer in ERG-transduced glands.

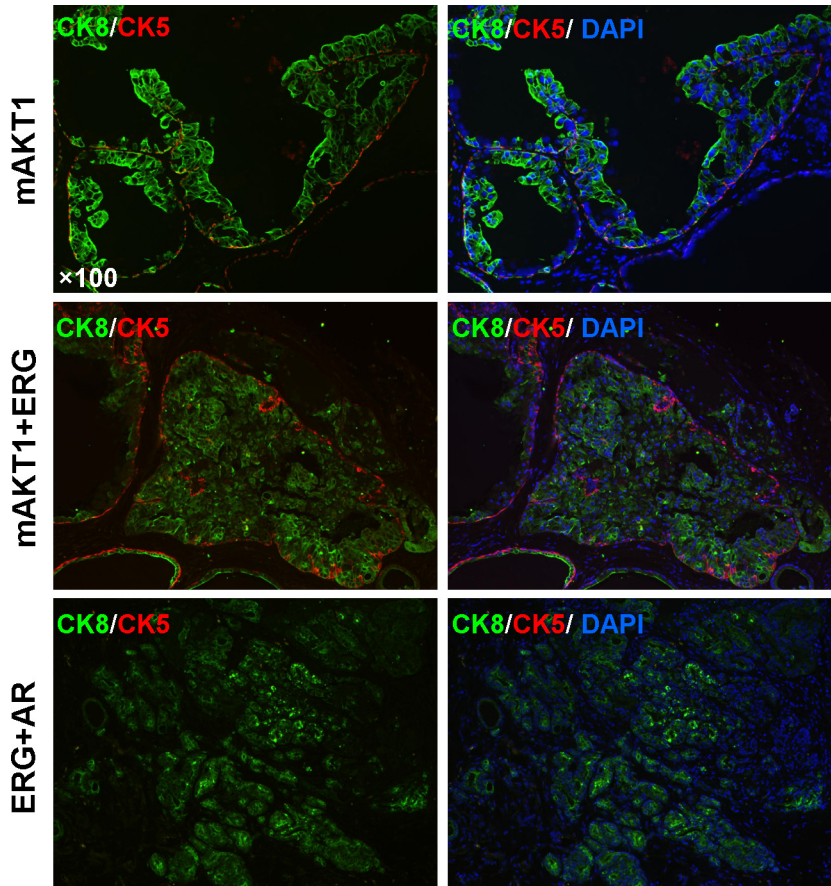

**Fig. S5.** Loss of CK5-positive basal epithelial cells in ERG/AR-induced prostate adenocarcinoma. IF analysis of CK5 and CK8 expression in regenerated tissues derived from prostate cells transduced with the indicated lentiviral vectors.
